# Supplementary material
Source: PubMed Central journal article supplement (PMC9257680)
Supplement: jamainternmed-e222488-s001.pdf [file jamainternmed-e222488-s001.pdf]

## Supplemental Online Content

dos Santos M, Ferrari G, Lee DH, et al. Association of the “weekend warrior” and other leisure-time physical activity patterns with all-cause and cause-specific mortality: a nationwide cohort study. *JAMA Intern Med*. Published online July 5, 2022. doi:10.1001/jamainternmed.2022.2488

**eTable 1.** The number and proportion of missing data in NHIS, 1997-2013

**eTable 2.** Sensitivity analysis adjusted for total volume of PA: Associations Between Regularly Active Physical Activity Pattern and All-Cause and Cause-Specific Mortality by Frequency, Duration, and Intensity of activities

**eTable 3.** Sensitivity analysis adjusted for BMI: Associations Between Regularly Active Physical Activity Pattern and All-Cause and Cause-Specific Mortality by Frequency, Duration and Intensity of activities

**eTable 4.** Sensitivity analysis excluding participants with  $\geq 780$  min/week of physical activity: Associations Between Weekend Warriors Physical Activity Pattern and Mortality, with Regularly Active as the Reference Category

**eTable 5.** Sensitivity analysis excluding participants with  $\geq 600$  min/week of physical activity: Associations Between Weekend Warriors Physical Activity Pattern and Mortality, with Regularly Active as the Reference Category

**eTable 6.** Sensitivity analysis excluding the first 5 years of follow-up: Associations Between Weekend Warriors Physical Activity Pattern and Mortality, with Regularly Active as the Reference Category

This supplemental material has been provided by the authors to give readers additional information about their work.

**eTable 1. The number and proportion of missing data in NHIS, 1997-2013**

|                                       | <b>No.</b> | <b>%</b> |
|---------------------------------------|------------|----------|
| <b>Education level</b>                | 1,685      | 0.50     |
| <b>Marital status</b>                 | 846        | 0.17     |
| <b>BMI</b>                            | 10,753     | 2.98     |
| <b>Smoking status</b>                 | 880        | 0.24     |
| <b>Alcohol intake</b>                 | 3,799      | 1.07     |
| <b>Serious psychological distress</b> | 3,235      | 0.92     |
| <b>Number of chronic conditions</b>   | 737        | 0.19     |
| <b>Self-rated health</b>              | 121        | 0.03     |
| <b>Mobility</b>                       | 2,879      | 0.74     |

**eTable 2. Sensitivity analysis adjusted for total volume of PA: Associations Between Regularly Active Physical Activity Pattern and All-Cause and Cause-Specific Mortality by Frequency, Duration, and Intensity of activities**

| <b>Dimensions of Physical Activity</b> | <b>All-cause Mortality</b>     | <b>CVD mortality</b>           | <b>Cancer mortality</b>        |
|----------------------------------------|--------------------------------|--------------------------------|--------------------------------|
|                                        | <b>HR (95% CI)<sup>a</sup></b> | <b>HR (95% CI)<sup>a</sup></b> | <b>HR (95% CI)<sup>a</sup></b> |
| <b>Physical Activity Pattern</b>       |                                |                                |                                |
| Inactive                               | 1.00 [Reference]               | 1.00 [Reference]               | 1.00 [Reference]               |
| Regularly active                       | 0.85 (0.82 to 0.88)            | 0.76 (0.69 to 0.84)            | 0.88 (0.82 to 0.94)            |
| <b>Frequency (times/week)</b>          |                                |                                |                                |
| 3-4 times/week                         | 0.81 (0.75 to 0.86)            | 0.80 (0.67 to 0.96)            | 0.83 (0.73 to 0.93)            |
| 5+ times/week                          | 0.86 (0.82 to 0.90)            | 0.74 (0.67 to 0.83)            | 0.90 (0.82 to 0.97)            |
| <b>Duration (min/each time)</b>        |                                |                                |                                |
| ≤20                                    | 1.01 (0.85 to 1.21)            | 0.85 (0.55 to 1.29)            | 1.10 (0.83 to 1.46)            |
| >20 to ≤30                             | 0.91 (0.85 to 0.98)            | 0.74 (0.62 to 0.89)            | 0.97 (0.85 to 1.10)            |
| >30 to ≤60                             | 0.84 (0.79 to 0.88)            | 0.76 (0.67 to 0.87)            | 0.86 (0.79 to 0.95)            |
| >60                                    | 0.80 (0.75 to 0.85)            | 0.74 (0.64 to 0.86)            | 0.81 (0.73 to 0.91)            |
| <b>Intensity (% VPA/MVPA)</b>          |                                |                                |                                |
| 0%                                     | 0.90 (0.86 to 0.95)            | 0.74 (0.64 to 0.84)            | 0.92 (0.83 to 1.03)            |
| 1%-25%                                 | 0.79 (0.69 to 0.89)            | 0.86 (0.65 to 1.14)            | 0.74 (0.59 to 0.93)            |
| 26%-50%                                | 0.92 (0.84 to 1.02)            | 0.87 (0.68 to 1.11)            | 1.00 (0.85 to 1.17)            |
| 51%-75%                                | 0.79 (0.73 to 0.85)            | 0.72 (0.60 to 0.85)            | 0.75 (0.66 to 0.85)            |
| 76%-99%                                | 0.79 (0.73 to 0.86)            | 0.62 (0.48 to 0.79)            | 0.89 (0.77 to 1.03)            |
| 100%                                   | 0.82 (0.75 to 0.89)            | 0.90 (0.75 to 1.07)            | 0.92 (0.80 to 1.07)            |

Abbreviations: CI, confidence interval; CVD, cardiovascular disease; HR, hazard ratio  
a, adjusted for age, sex, race/ethnicity, education, income, marital status, smoking, alcohol intake, self-rated health, psychological distress, number of diseases/comorbidities, mobility and total volume of PA.

**eTable 3. Sensitivity analysis adjusted for BMI: Associations Between Regularly Active Physical Activity Pattern and All-Cause and Cause-Specific Mortality by Frequency, Duration and Intensity of activities**

| Dimensions of Physical Activity          | All-cause Mortality      | CVD mortality            | Cancer mortality         |
|------------------------------------------|--------------------------|--------------------------|--------------------------|
|                                          | HR (95% CI) <sup>a</sup> | HR (95% CI) <sup>a</sup> | HR (95% CI) <sup>a</sup> |
| <b>Physical Activity Pattern</b>         |                          |                          |                          |
| Inactive                                 | 1.00 [Reference]         | 1.00 [Reference]         | 1.00 [Reference]         |
| Regularly active                         | 0.85 (0.82 to 0.88)      | 0.77 (0.71 to 0.84)      | 0.89 (0.83 to 0.95)      |
| <b>Frequency (times/week)</b>            |                          |                          |                          |
| 3-4 times/week                           | 0.81 (0.76 to 0.86)      | 0.81 (0.68 to 0.97)      | 0.83 (0.73 to 0.94)      |
| 5+ times/week                            | 0.86 (0.83 to 0.90)      | 0.76 (0.70 to 0.83)      | 0.90 (0.84 to 0.97)      |
| <b>Duration of sessions (in minutes)</b> |                          |                          |                          |
| ≤20                                      | 1.02 (0.86 to 1.21)      | 0.85 (0.56 to 1.30)      | 1.11 (0.83 to 1.47)      |
| >20 to ≤30                               | 0.91 (0.85 to 0.98)      | 0.75 (0.62 to 0.90)      | 0.98 (0.86 to 1.12)      |
| >30 to ≤60                               | 0.84 (0.80 to 0.89)      | 0.77 (0.68 to 0.87)      | 0.88 (0.80 to 0.96)      |
| >60                                      | 0.83 (0.79 to 0.87)      | 0.77 (0.69 to 0.87)      | 0.85 (0.77 to 0.93)      |
| <b>Intensity (% VPA/MVPA)</b>            |                          |                          |                          |
| 0%                                       | 0.91 (0.86 to 0.95)      | 0.74 (0.65 to 0.85)      | 0.93 (0.84 to 1.03)      |
| 1%-25%                                   | 0.80 (0.71 to 0.91)      | 0.89 (0.68 to 1.16)      | 0.76 (0.61 to 0.94)      |
| 26%-50%                                  | 0.94 (0.85 to 1.03)      | 0.89 (0.71 to 1.13)      | 1.01 (0.87 to 1.19)      |
| 51%-75%                                  | 0.80 (0.75 to 0.85)      | 0.73 (0.62 to 0.87)      | 0.76 (0.68 to 0.86)      |
| 76%-99%                                  | 0.81 (0.75 to 0.87)      | 0.64 (0.51 to 0.80)      | 0.91 (0.78 to 1.05)      |
| 100%                                     | 0.85 (0.74 to 0.98)      | 0.92 (0.77 to 1.09)      | 0.94 (0.82 to 1.08)      |

Abbreviations: CI, confidence interval; CVD, cardiovascular disease; HR, hazard ratio; NA, not applicable/able to calculate

a, adjusted for age, sex, race/ethnicity, education, income, marital status, smoking, BMI, alcohol intake, self-rated health, psychological distress, number of diseases/comorbidities and mobility.

**eTable 4. Sensitivity analysis excluding participants with  $\geq 780$  min/week of physical activity: Associations Between Weekend Warriors Physical Activity Pattern and Mortality, with Regularly Active as the Reference Category**

| <b>Dimensions of Physical Activity</b> | <b>All-cause Mortality</b>     | <b>CVD mortality</b>           | <b>Cancer mortality</b>        |
|----------------------------------------|--------------------------------|--------------------------------|--------------------------------|
|                                        | <b>HR (95% CI)<sup>a</sup></b> | <b>HR (95% CI)<sup>a</sup></b> | <b>HR (95% CI)<sup>a</sup></b> |
| <b>Physical Activity Pattern</b>       |                                |                                |                                |
| Regularly active                       | 1.00 [Reference]               | 1.00 [Reference]               | 1.00 [Reference]               |
| Weekend Warrior                        | 1.08 (0.97 to 1.20)            | 1.14 (0.85 to 1.53)            | 1.06 (0.85 to 1.30)            |
| <b>Frequency (times/week)</b>          |                                |                                |                                |
| 1 time/week                            | 1.01 (0.82 to 1.24)            | 1.40 (0.87 to 2.26)            | 0.73 (0.46 to 1.16)            |
| 2 times/week                           | 1.11 (0.98 to 1.26)            | 0.98 (0.71 to 1.35)            | 1.23 (0.97 to 1.55)            |
| <b>Intensity (% VPA/MVPA)</b>          |                                |                                |                                |
| 0%                                     | 1.15 (0.98 to 1.34)            | 1.19 (0.80 to 1.78)            | 1.27 (0.95 to 1.71)            |
| 1%-25%                                 | 0.74 (0.39 to 1.41)            | 0.55 (0.08 to 3.95)            | 0.97 (0.33 to 2.89)            |
| 26%-50%                                | 1.04 (0.65 to 1.66)            | NA                             | 1.10 (0.41 to 2.93)            |
| 51%-75%                                | 0.87 (0.56 to 1.33)            | 0.69 (0.25 to 1.87)            | 0.64 (0.31 to 1.32)            |
| 76%-99%                                | 0.99 (0.66 to 1.48)            | 1.68 (0.82 to 3.45)            | 0.79 (0.32 to 1.94)            |
| 100%                                   | 1.11 (0.94 to 1.31)            | 1.14 (0.70 to 1.86)            | 1.03 (0.73 to 1.46)            |

Abbreviations: CI, confidence interval; CVD, cardiovascular disease; HR, hazard ratio; NA, not applicable/able to calculate

a, adjusted for age, sex, race/ethnicity, education, income, marital status, smoking, alcohol intake, self-rated health, psychological distress, number of diseases/comorbidities, mobility and total volume of PA.

**eTable 5. Sensitivity analysis excluding participants with  $\geq 600$  min/week of physical activity: Associations Between Weekend Warriors Physical Activity Pattern and Mortality, with Regularly Active as the Reference Category**

| Dimensions of Physical Activity  | All-cause Mortality      | CVD mortality            | Cancer mortality         |
|----------------------------------|--------------------------|--------------------------|--------------------------|
|                                  | HR (95% CI) <sup>a</sup> | HR (95% CI) <sup>a</sup> | HR (95% CI) <sup>a</sup> |
| <b>Physical Activity Pattern</b> |                          |                          |                          |
| Regularly active                 | 1.00 [Reference]         | 1.00 [Reference]         | 1.00 [Reference]         |
| Weekend Warrior                  | 1.09 (0.98 to 1.22)      | 1.14 (0.84 to 1.54)      | 1.07 (0.87 to 1.33)      |
| <b>Frequency (times/week)</b>    |                          |                          |                          |
| 1 times/week                     | 1.02 (0.83 to 1.25)      | 1.43 (0.89 to 2.30)      | 0.72 (0.45 to 1.16)      |
| 2 times/week                     | 1.13 (0.99 to 1.28)      | 0.95 (0.68 to 1.33)      | 1.27 (1.00 to 1.61)      |
| <b>Intensity (% VPA/MVPA)</b>    |                          |                          |                          |
| 0%                               | 1.15 (0.98 to 1.35)      | 1.21 (0.81 to 1.80)      | 1.31 (0.97 to 1.77)      |
| 1%-25%                           | 0.76 (0.40 to 1.44)      | 0.55 (0.08 to 4.00)      | 1.01 (0.34 to 2.99)      |
| 26%-50%                          | 1.06 (0.66 to 1.69)      | NA                       | 1.12 (0.42 to 2.97)      |
| 51%-75%                          | 0.90 (0.59 to 1.38)      | 0.71 (0.26 to 1.94)      | 0.66 (0.32 to 1.37)      |
| 76%-99%                          | 0.99 (0.65 to 1.52)      | 1.75 (0.85 to 3.58)      | 0.84 (0.34 to 2.05)      |
| 100%                             | 1.13 (0.96 to 1.34)      | 1.08 (0.65 to 1.82)      | 1.03 (0.73 to 1.47)      |

Abbreviations: CI, confidence interval; CVD, cardiovascular disease; HR, hazard ratio; NA, not applicable/able to calculate

a, adjusted for age, sex, race/ethnicity, education, income, marital status, smoking, alcohol intake, self-rated health, psychological distress, number of diseases/comorbidities, mobility and total volume of PA.

**eTable 6. Sensitivity analysis excluding the first 5 years of follow-up: Associations Between Weekend Warriors Physical Activity Pattern and Mortality, with Regularly Active as the Reference Category**

| <b>Dimensions of Physical Activity</b> | <b>All-cause Mortality</b>     | <b>CVD mortality</b>           | <b>Cancer mortality</b>        |
|----------------------------------------|--------------------------------|--------------------------------|--------------------------------|
|                                        | <b>HR (95% CI)<sup>a</sup></b> | <b>HR (95% CI)<sup>a</sup></b> | <b>HR (95% CI)<sup>a</sup></b> |
| <b>Physical Activity Pattern</b>       |                                |                                |                                |
| Regularly active                       | 1.00 [Reference]               | 1.00 [Reference]               | 1.00 [Reference]               |
| Weekend Warrior                        | 1.12 (0.99 to 1.26)            | 1.19 (0.86 to 1.64)            | 1.11 (0.88 to 1.38)            |
| <b>Frequency (times/week)</b>          |                                |                                |                                |
| 1 times/week                           | 1.14 (0.91 to 1.43)            | 1.66 (0.98 to 2.80)            | 0.82 (0.49 to 1.36)            |
| 2 times/week                           | 1.10 (0.96 to 1.26)            | 0.96 (0.69 to 1.34)            | 1.25 (0.97 to 1.60)            |
| <b>Intensity (% VPA/MVPA)</b>          |                                |                                |                                |
| 0%                                     | 1.16 (0.98 to 1.38)            | 1.28 (0.84 to 1.95)            | 1.31 (0.96 to 1.77)            |
| 1%-25%                                 | 0.79 (0.40 to 1.56)            | 0.76 (0.10 to 5.51)            | 0.76 (0.21 to 2.69)            |
| 26%-50%                                | 1.08 (0.65 to 1.78)            | NA                             | 0.96 (0.33 to 2.81)            |
| 51%-75%                                | 0.79 (0.51 to 1.21)            | 0.68 (0.22 to 2.18)            | 0.85 (0.41 to 1.76)            |
| 76%-99%                                | 0.81 (0.49 to 1.35)            | 1.49 (0.66 to 3.39)            | 0.71 (0.23 to 2.20)            |
| 100%                                   | 1.22 (1.02 to 1.46)            | 1.25 (0.73 to 2.12)            | 1.12 (0.78 to 1.62)            |

Abbreviations: CI, confidence interval; CVD, cardiovascular disease; HR, hazard ratio; NA, not applicable/able to calculate

a, adjusted for age, sex, race/ethnicity, education, income, marital status, smoking, alcohol intake, self-rated health, psychological distress, number of diseases/comorbidities, mobility and total volume of PA.
